# Supplementary material for: Identification of Cyclic Sulfonamides with an N-Arylacetamide Group as α-Glucosidase and α-Amylase Inhibitors: Biological Evaluation and Molecular Modeling
Source: MDPI journal article supplement (doi:10.3390/ph15010106), 2022-01-17
Supplement: s1 [file s1]

# Identification of cyclic sulfonamides with an *N*-arylacetamide group as $\alpha$ -glucosidase and $\alpha$ -amylase inhibitors: Biological evaluation and molecular modeling

Furqan Ahmad Saddique <sup>1</sup>, Matloob Ahmad <sup>1,\*</sup>, Usman Ali Ashfaq <sup>2</sup>, Muhammad Muddassar <sup>3</sup>, Sadia Sultan <sup>4,5</sup> and Magdi E. A. Zaki <sup>6,\*</sup>

<sup>1</sup> Department of Chemistry, Government College University, Faisalabad 38000, Pakistan; furqanas123@gmail.com

<sup>2</sup> Department of Bioinformatics and Biotechnology, Government College University, Faisalabad 38000, Pakistan; ashfaqua@gcuf.edu.pk

<sup>3</sup> Department of Biosciences, COMSATS University Islamabad, Park Road, Islamabad 45500, Pakistan; mmuddassar@comsats.edu.pk

<sup>3</sup> Faculty of Pharmacy, Universiti Teknologi MARA, Puncak Alam Campus, Bandar Puncak Alam 42300, Selangor Darul Ehsan, Malaysia; drsadia@uitm.edu.my

<sup>4</sup> Atta-ur-Rahman Institute for Natural Products Discovery (AuRIns), Universiti Teknologi MARA, Puncak Alam Campus, Bandar Puncak Alam 42300, Selangor Darul Ehsan, Malaysia; drsadia@uitm.edu.my

<sup>5</sup> Department of Chemistry, Faculty of Science, Imam Mohammad Ibn Saud Islamic University (IMSIU), Riyadh 11623, Saudi Arabia

\* Correspondence: Matloob.Ahmad@gcuf.edu.pk (M.A.); mezaki@imamu.edu.sa (M.E.A.Z.)  
(Supplementary Data File)

<sup>1</sup>H NMR, <sup>13</sup>C NMR, HRMS (ESI) spectra and 3D docking modes (Figure S1, Figure S2) of potent compounds (**12a**, **12c**, **12d**, **12g**, **12i**, **12k**). All the spectra were recorded using NMR Spectrophotometer (Hazimin) in deuterated DMSO and at 600 MHz frequency. HRMS (ESI) spectra were recorded using Agilent LC/TOF Mass 6210 Mass Spectrometer.

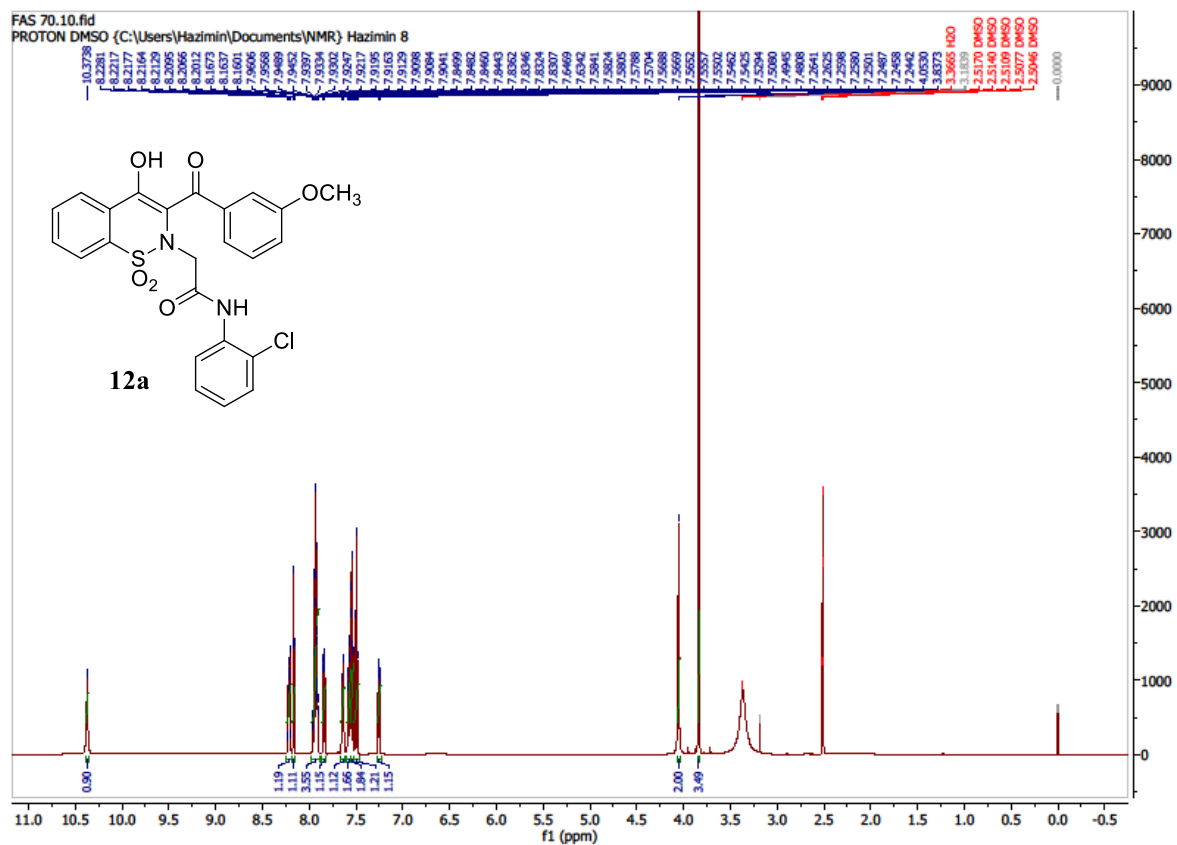

<sup>1</sup>H NMR Spectrum of compound 12a.

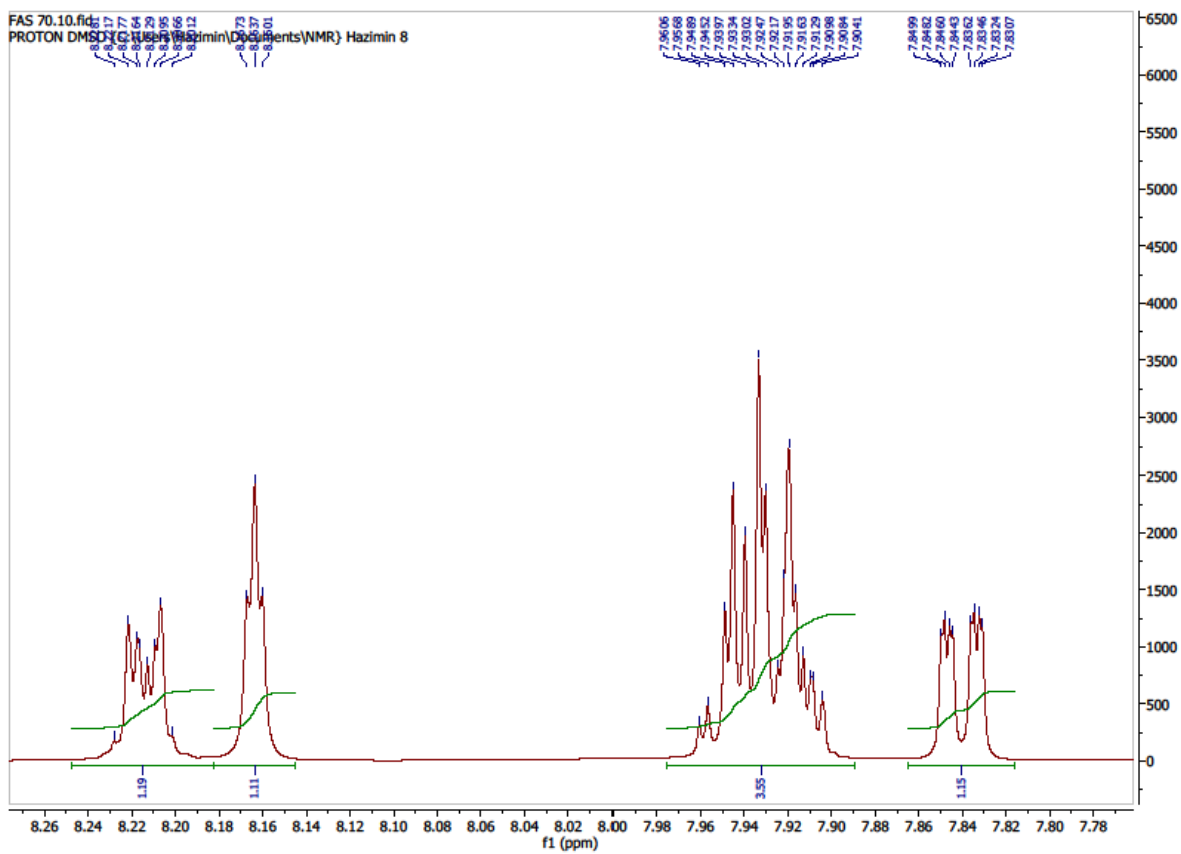

Expanded form of  $^1\text{H}$  NMR Spectrum of compound **12a** (region 7.80-8.26 ppm).

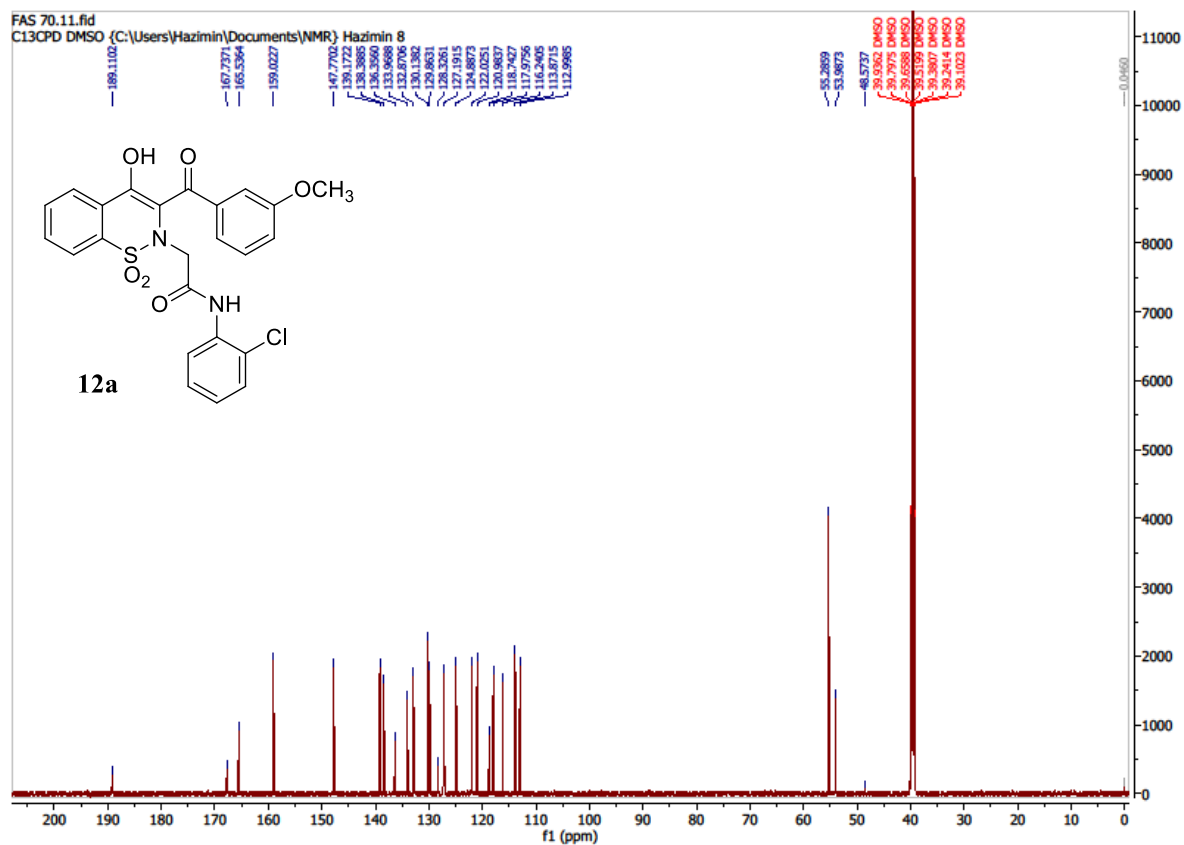

<sup>13</sup>C NMR Spectrum of compound **12a**.

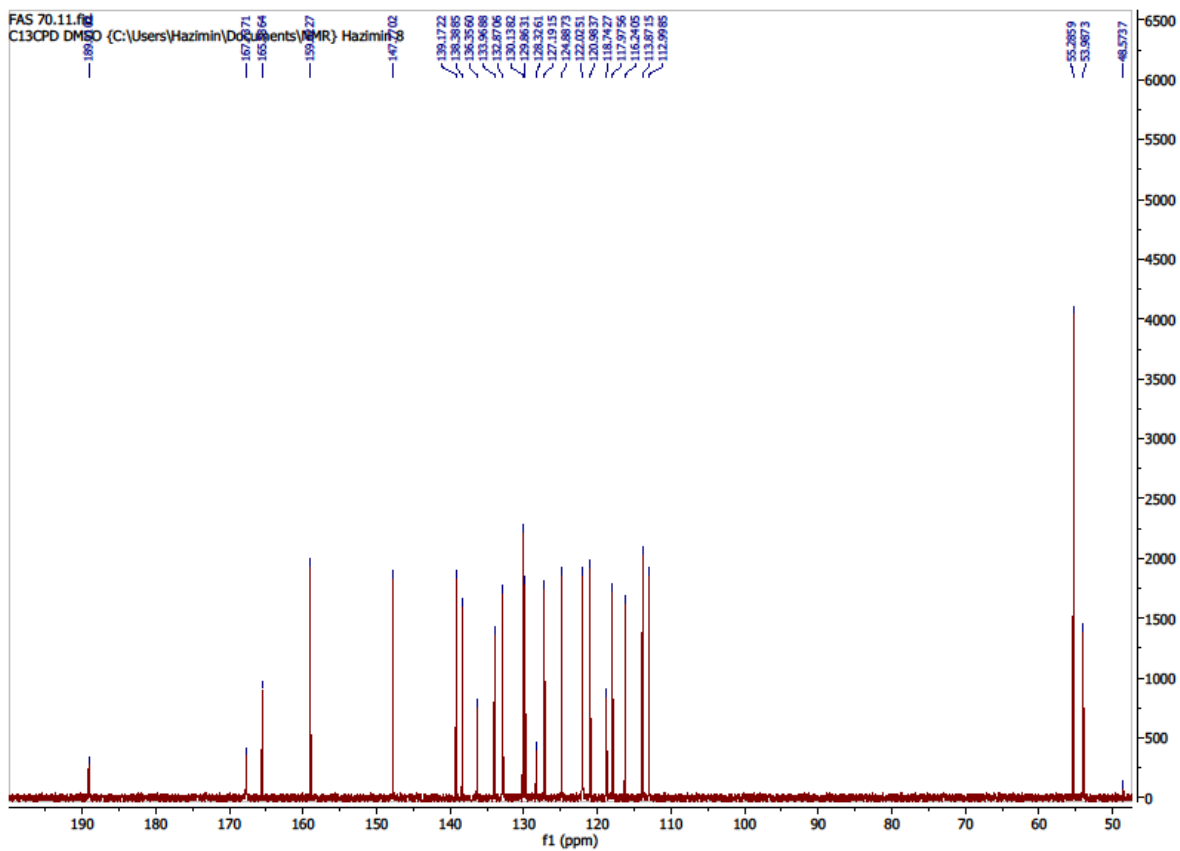

Expanded form of  $^{13}\text{C}$  NMR Spectrum of compound **12a** (region 110-140 ppm).

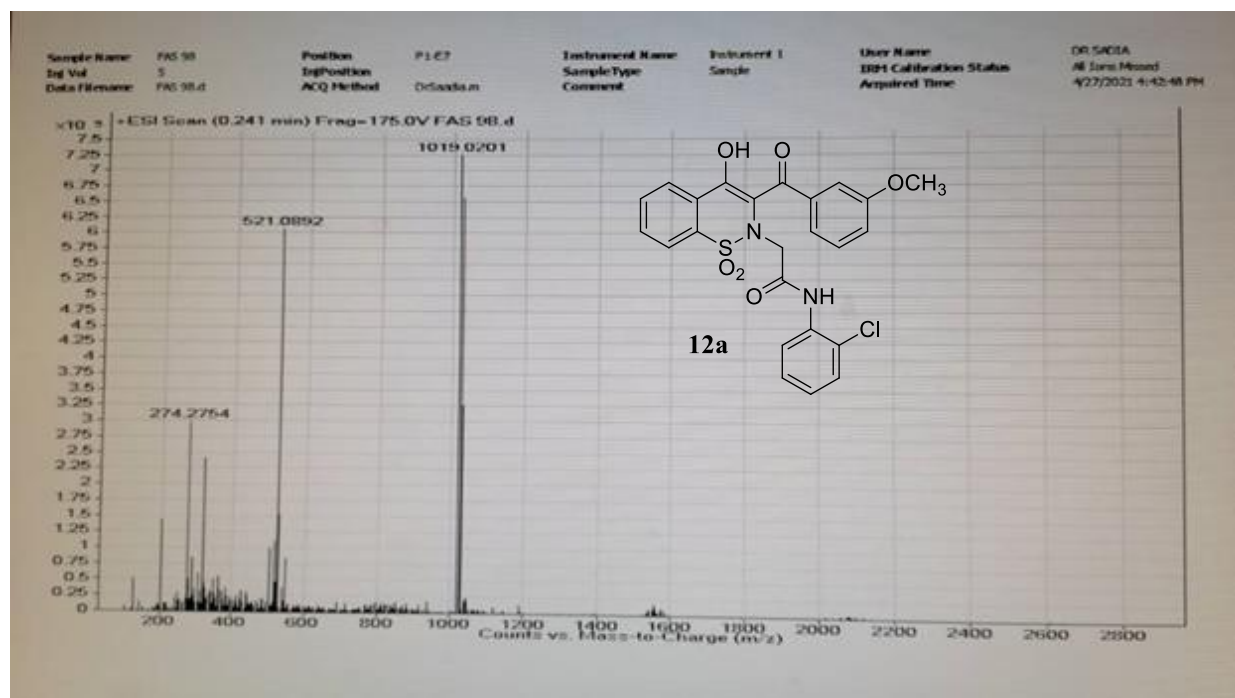

HRMS (ESI) Spectrum of compound **12a**.

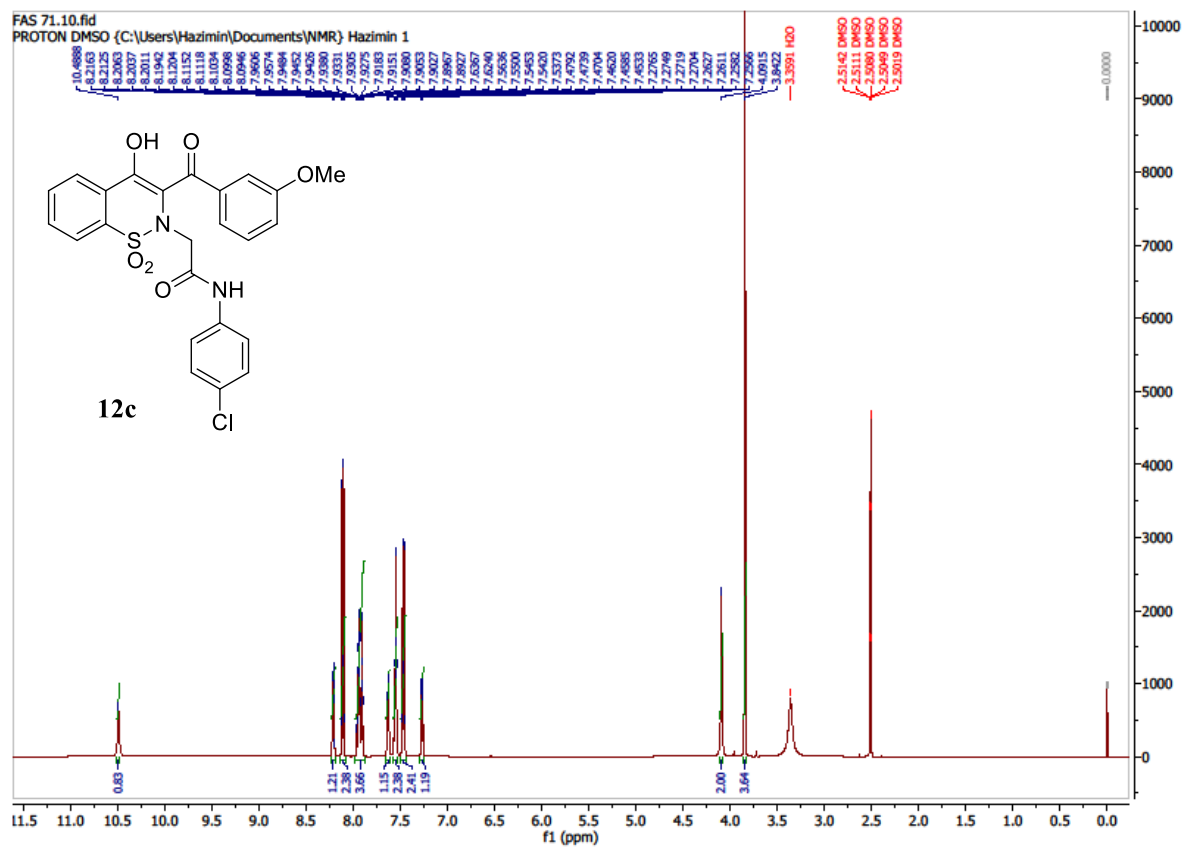

$^1\text{H}$  NMR Spectrum of compound **12c**.

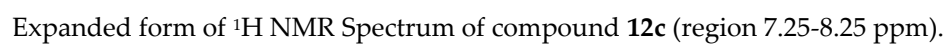

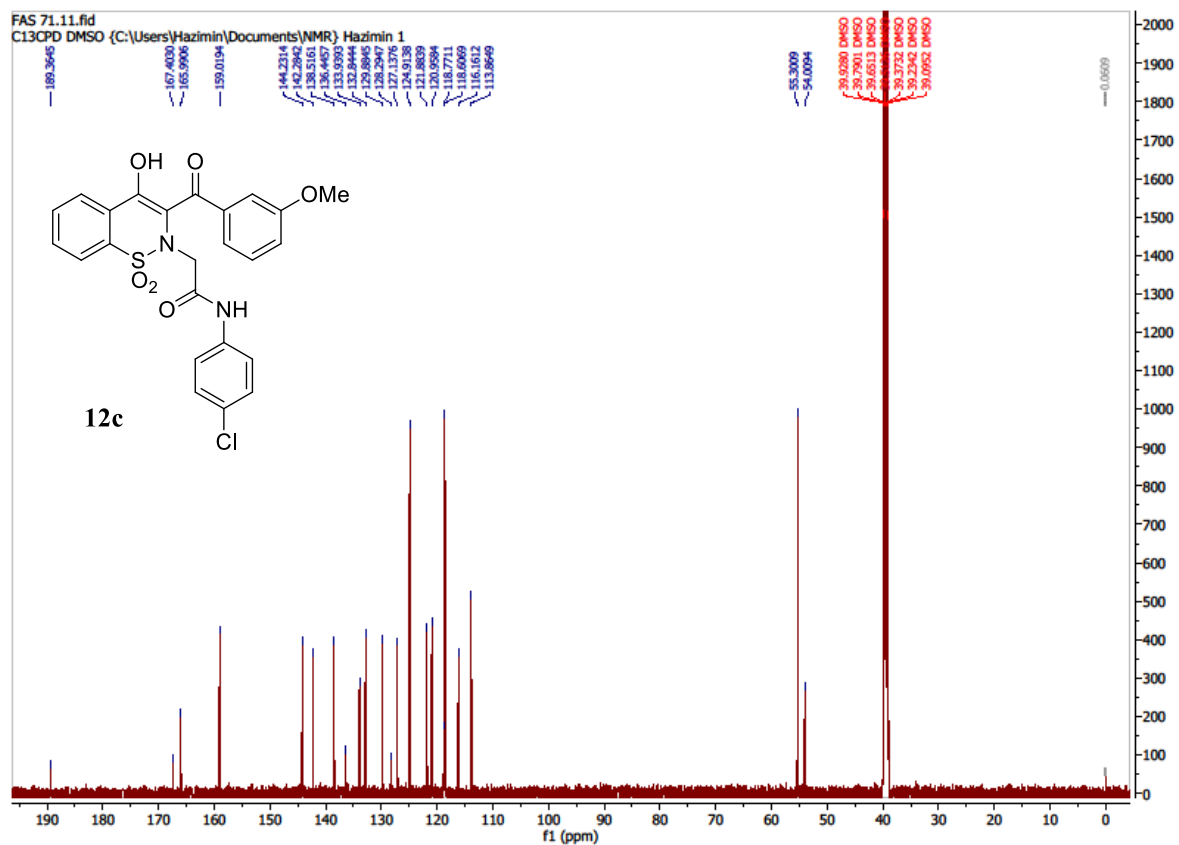

$^{13}\text{C}$  NMR Spectrum of compound **12c**.



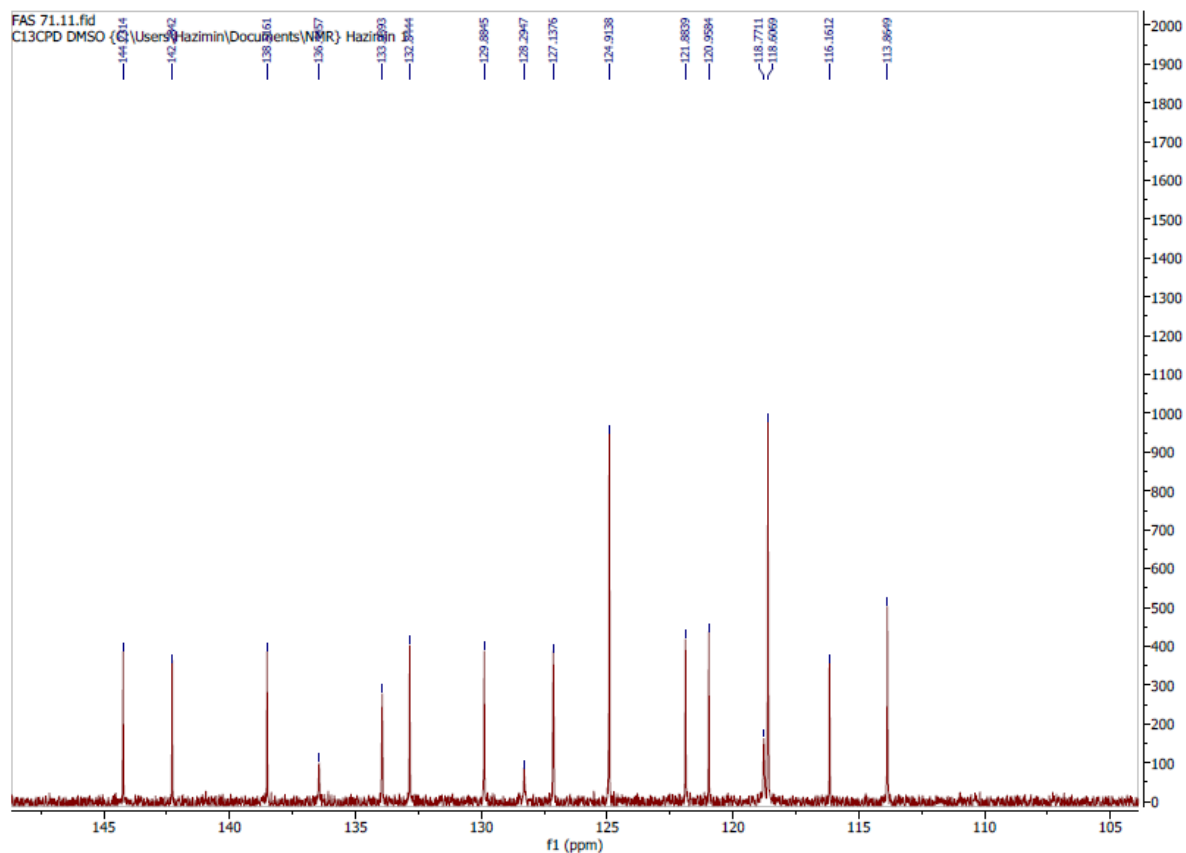

Expanded form of  $^{13}\text{C}$  NMR Spectrum of compound **12c** (region 110-145 ppm).

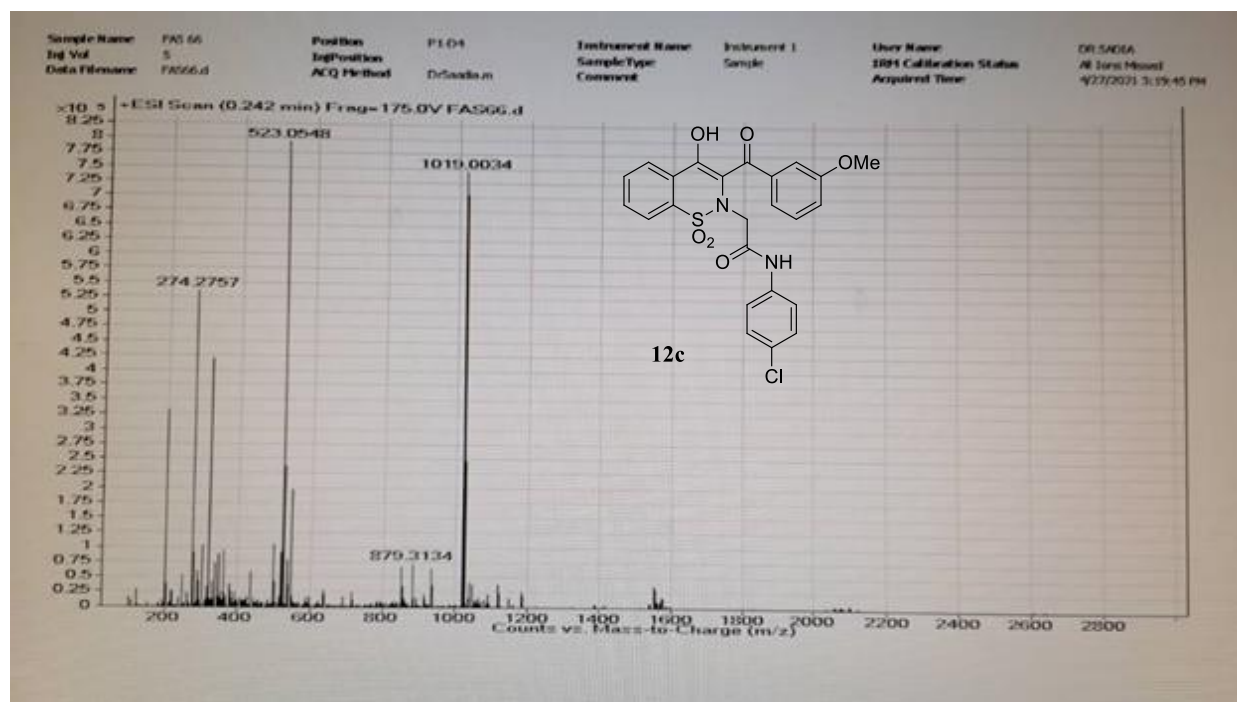

HRMS (ESI) Spectrum of compound **12c**.

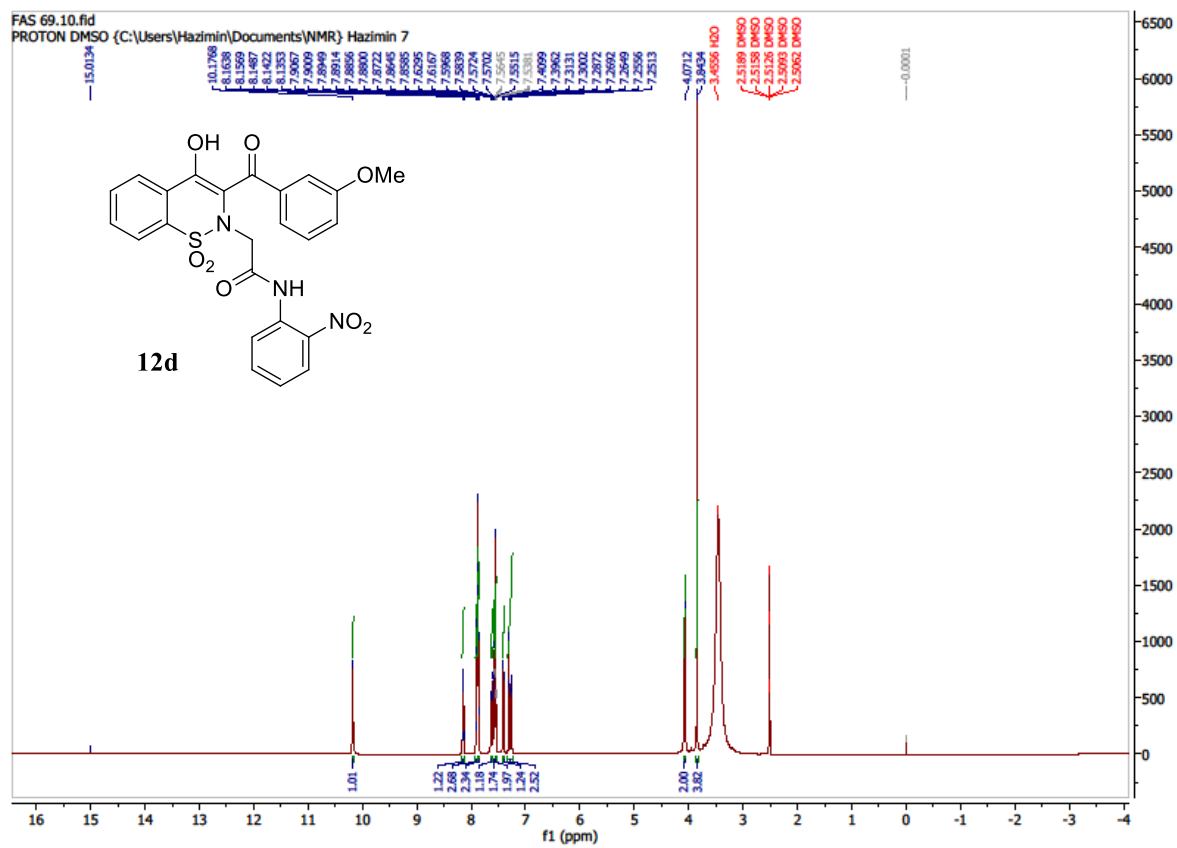

<sup>1</sup>H NMR Spectrum of compound **12d**.

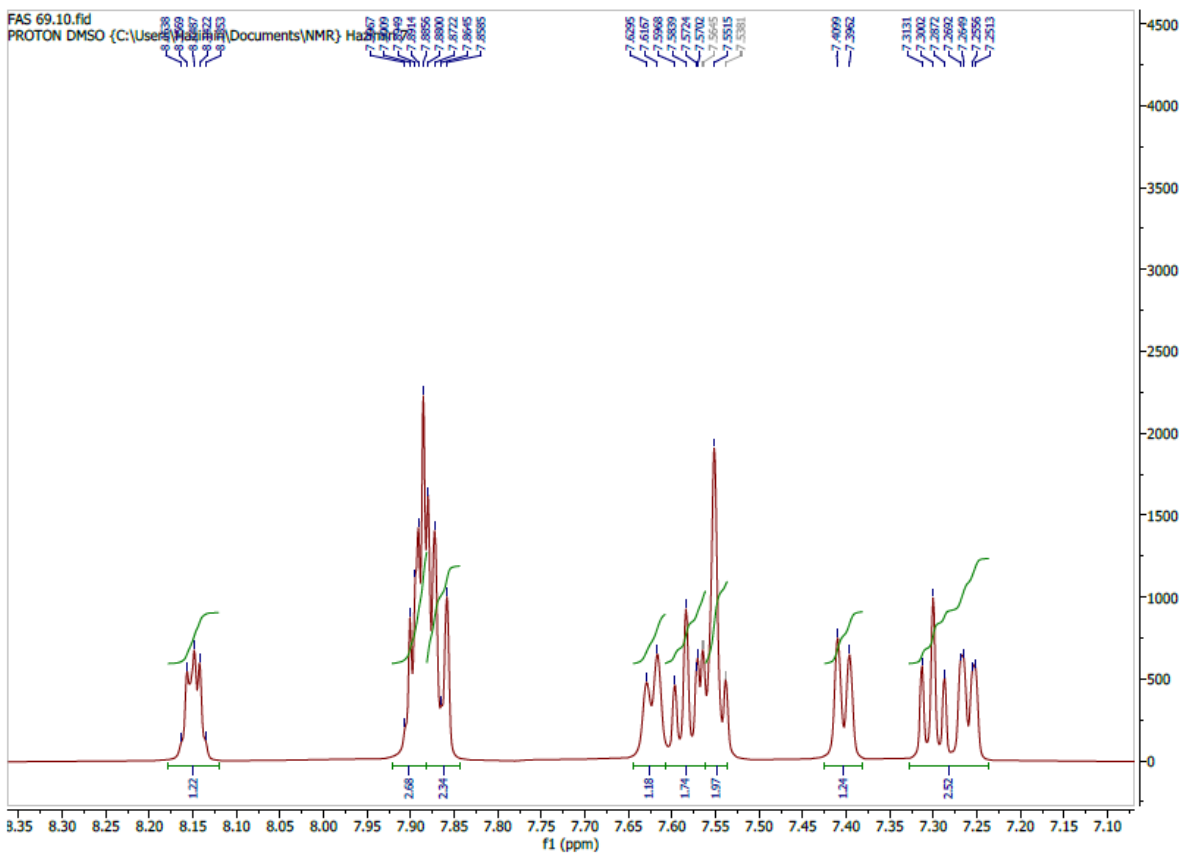

Expanded form of  $^1\text{H}$  NMR Spectrum of compound **12d** (region 7.20-8.20 ppm).

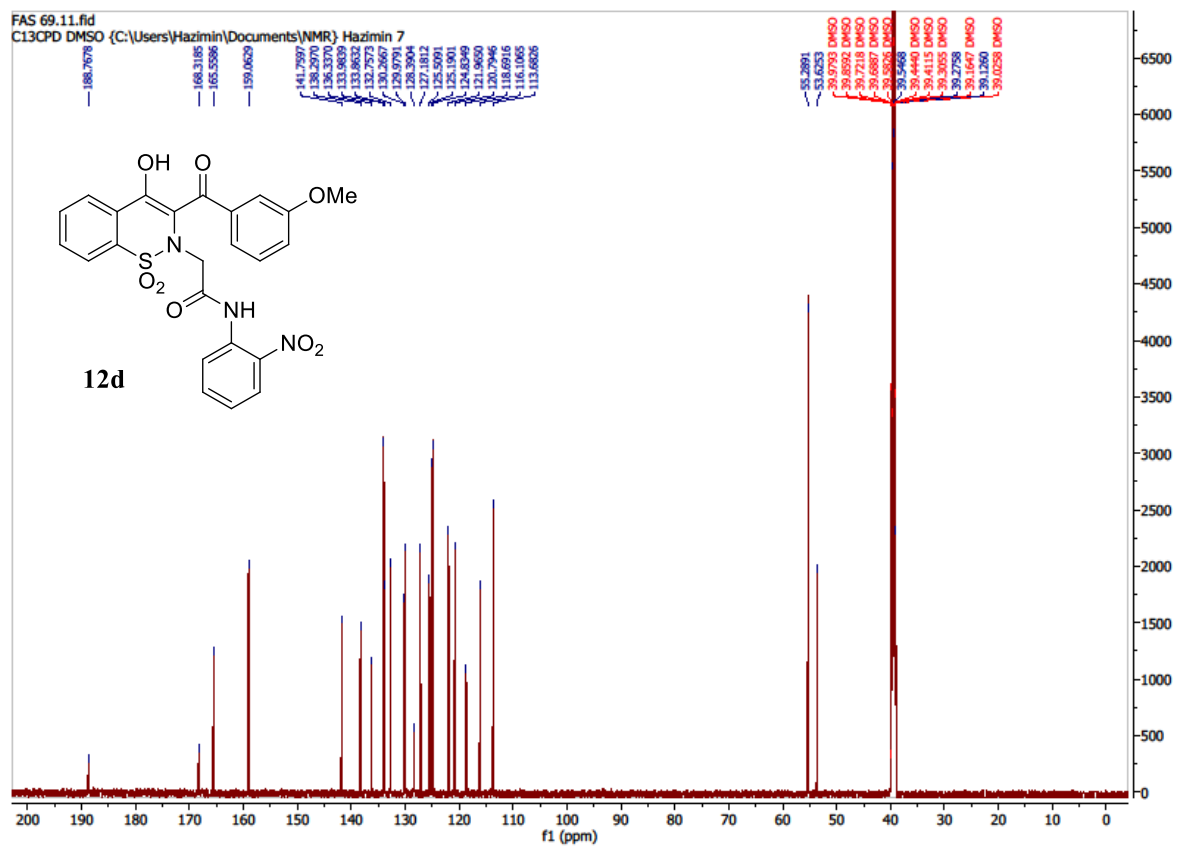

<sup>13</sup>C NMR Spectrum of compound **12d**.

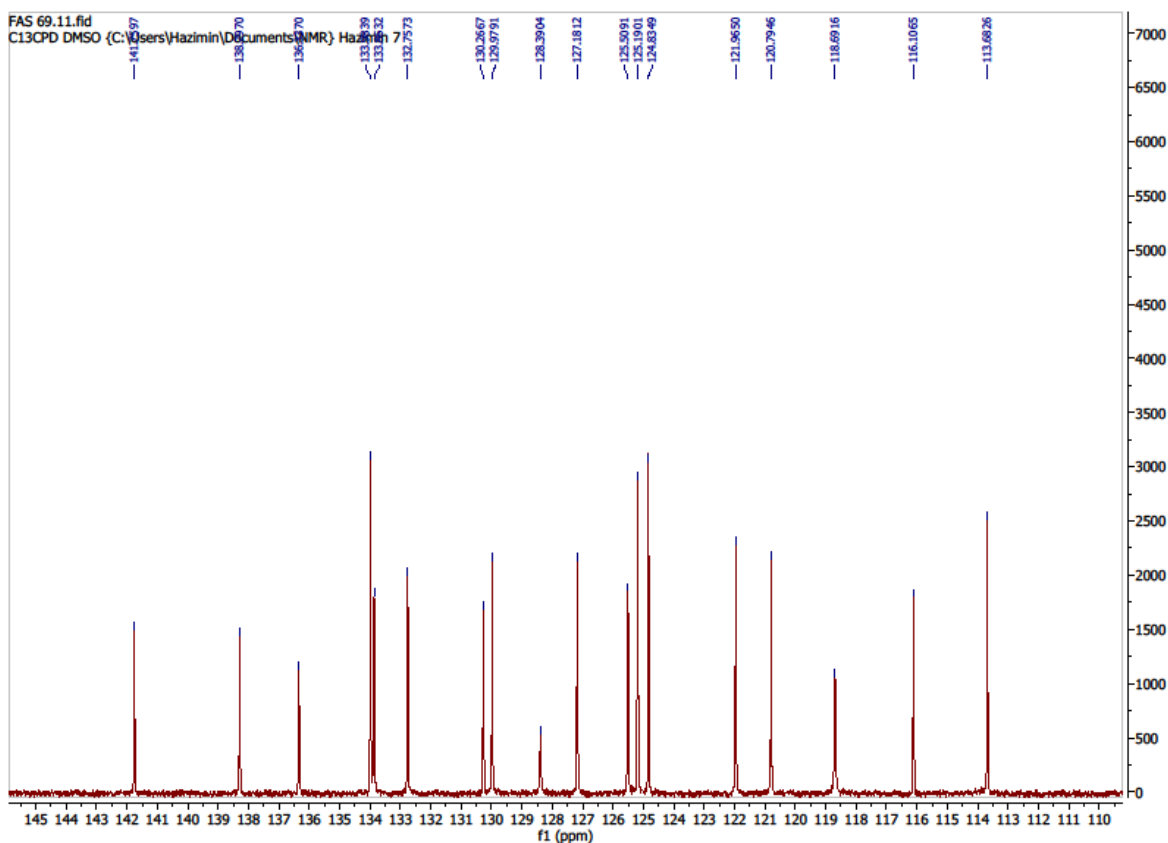

Expanded form of  $^{13}\text{C}$  NMR Spectrum of compound **12d** (region 113-142 ppm).

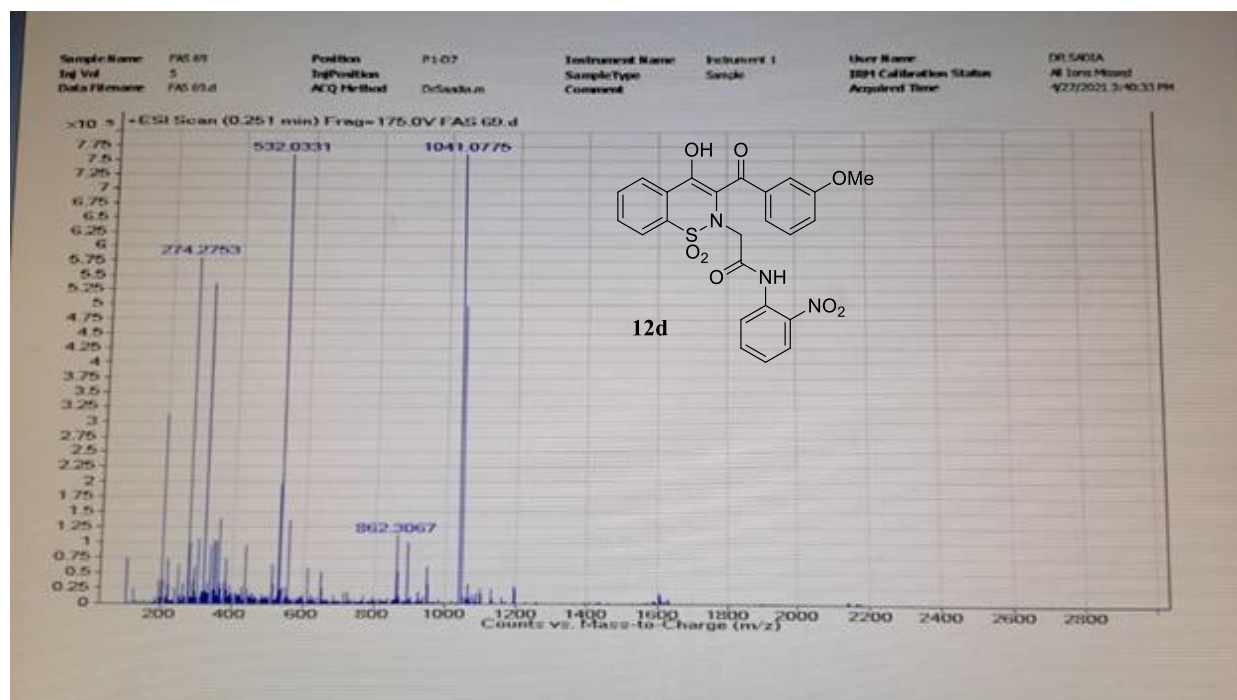

HRMS (ESI) Spectrum of compound **12d**.

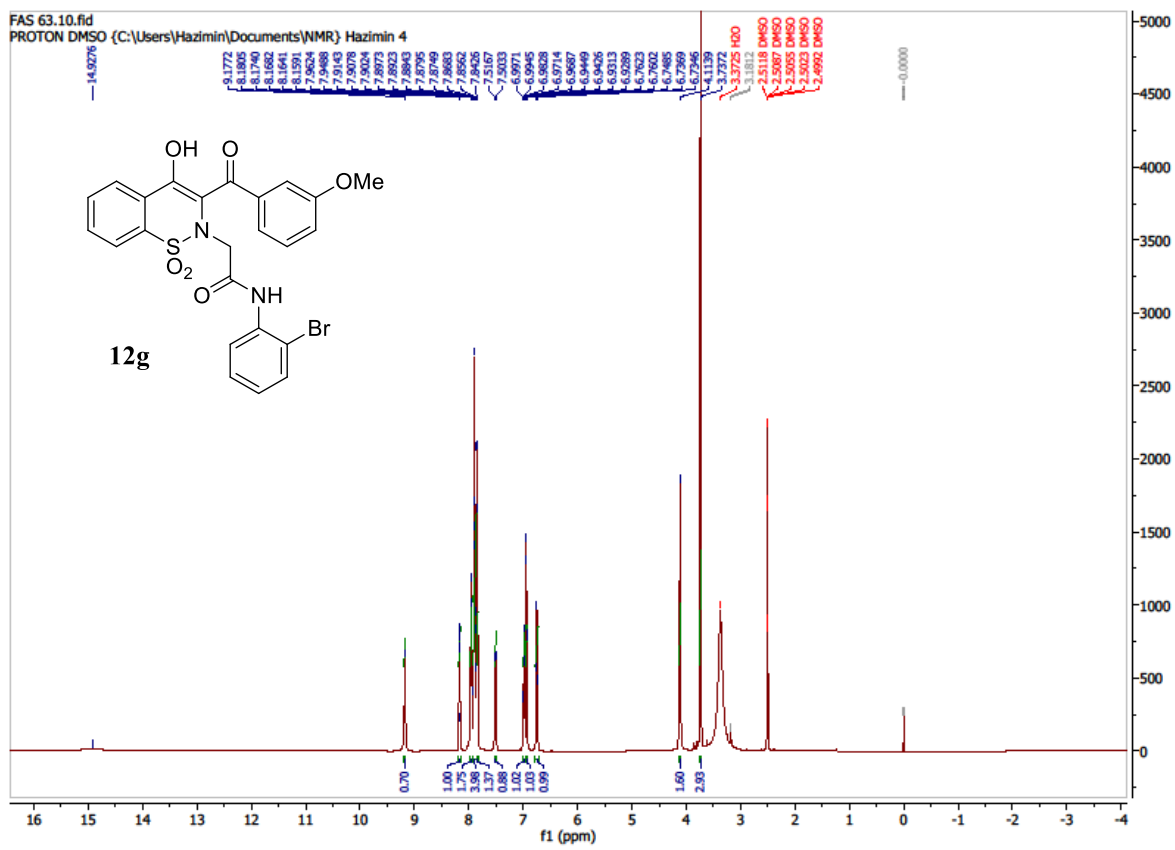

<sup>1</sup>H NMR Spectrum of compound 12g.

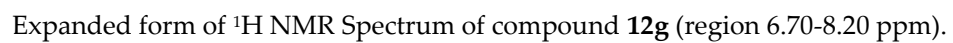

Expanded form of <sup>1</sup>H NMR Spectrum of compound **12g** (region 6.70-8.20 ppm).

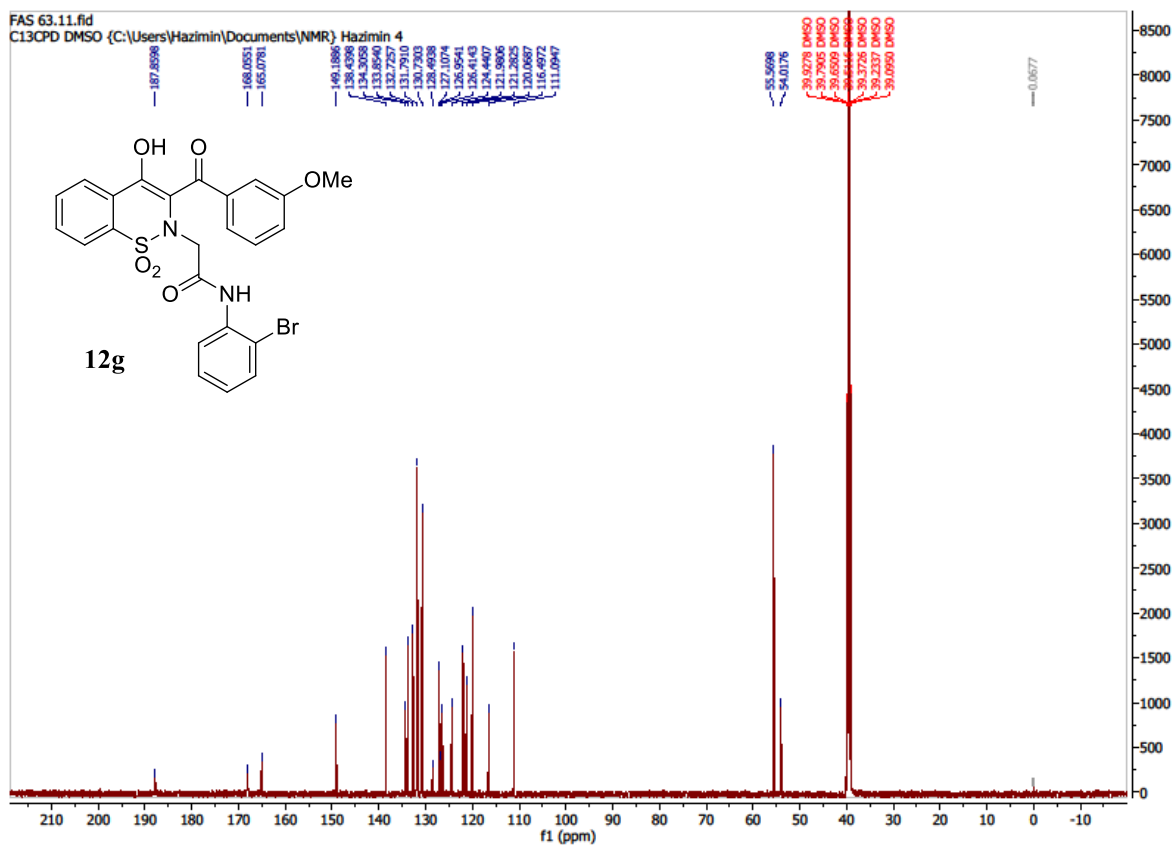

$^{13}\text{C}$  NMR Spectrum of compound **12g**.



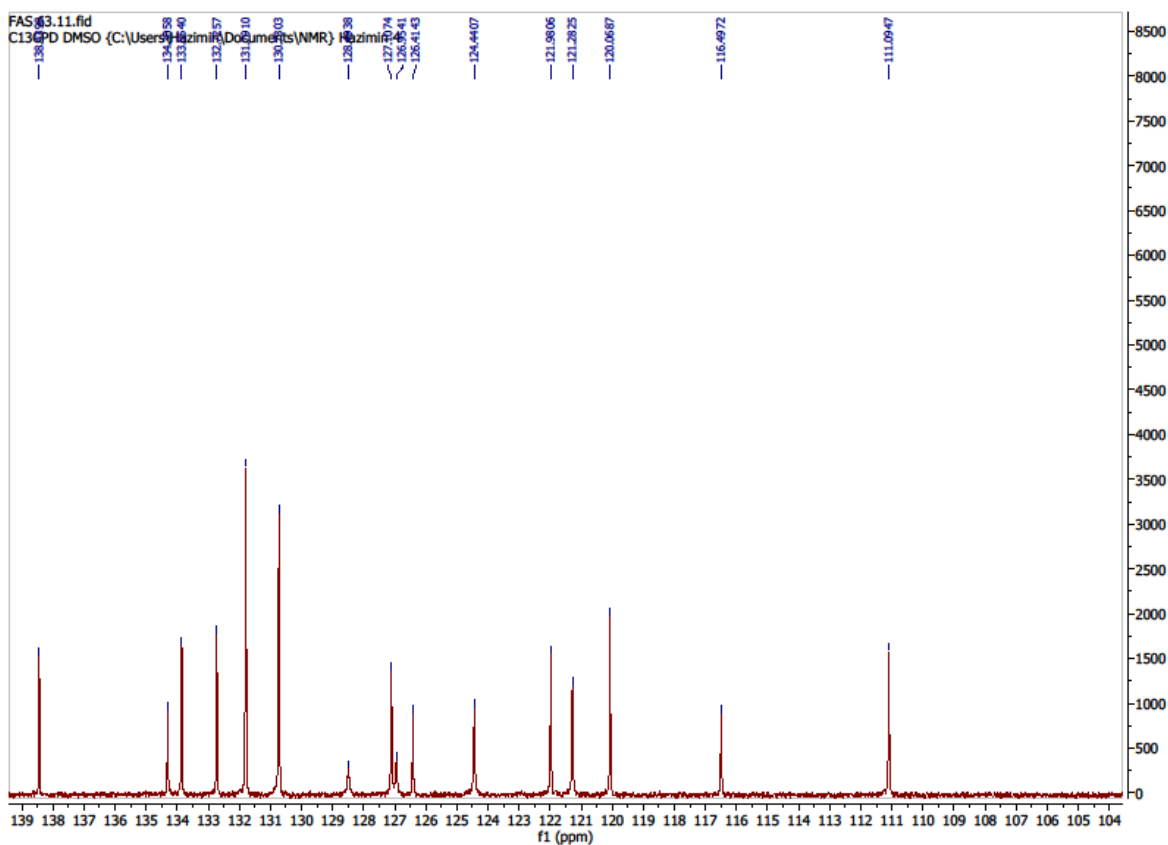

Expanded form of  $^{13}\text{C}$  NMR Spectrum of compound **12g** (region 120-135 ppm).

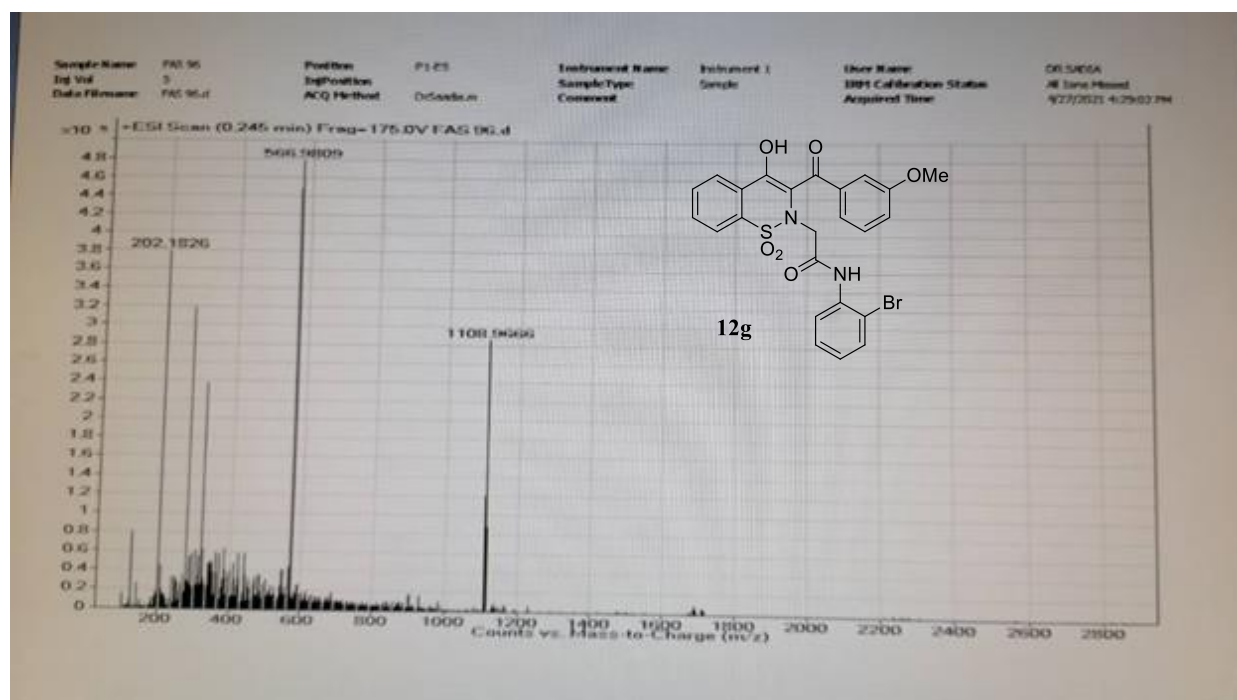

HRMS (ESI) Spectrum of compound **12g**.

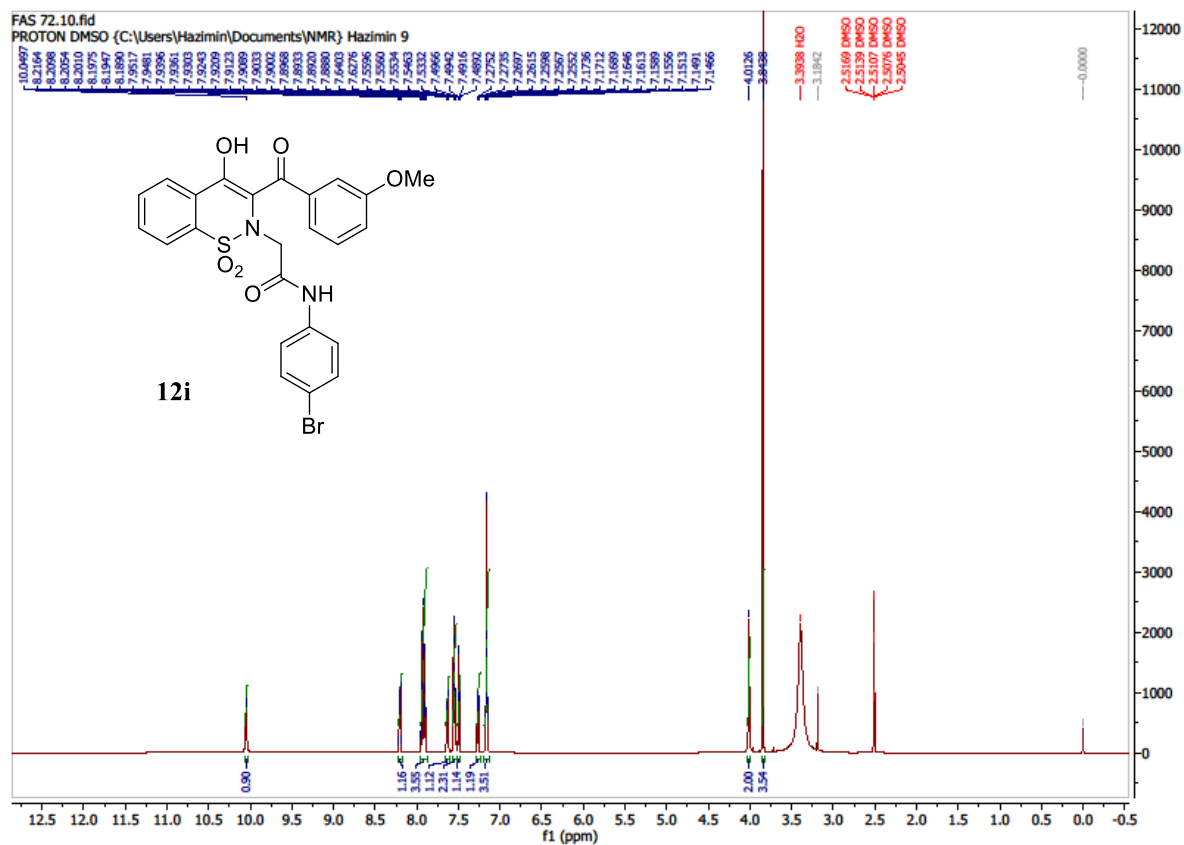

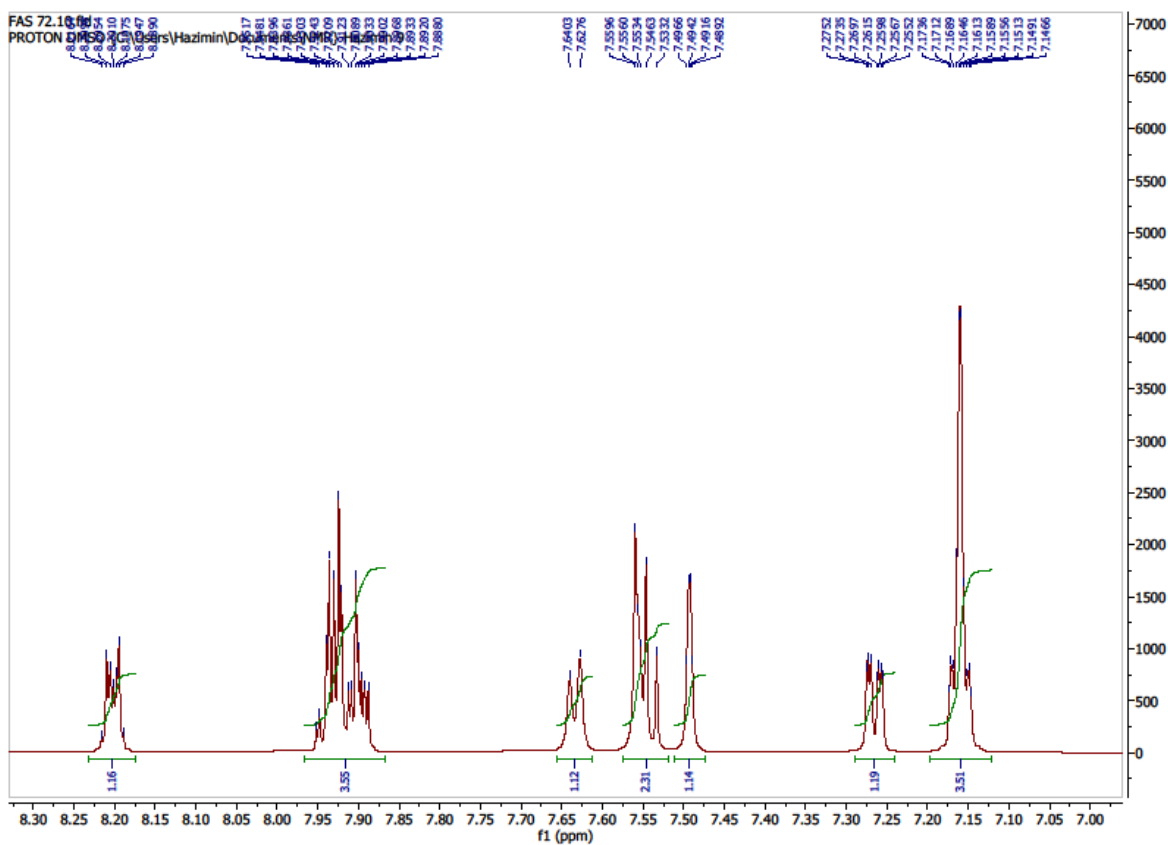

Expanded form of  $^1\text{H}$  NMR Spectrum of compound **12i** (region 7.10-8.25 ppm).

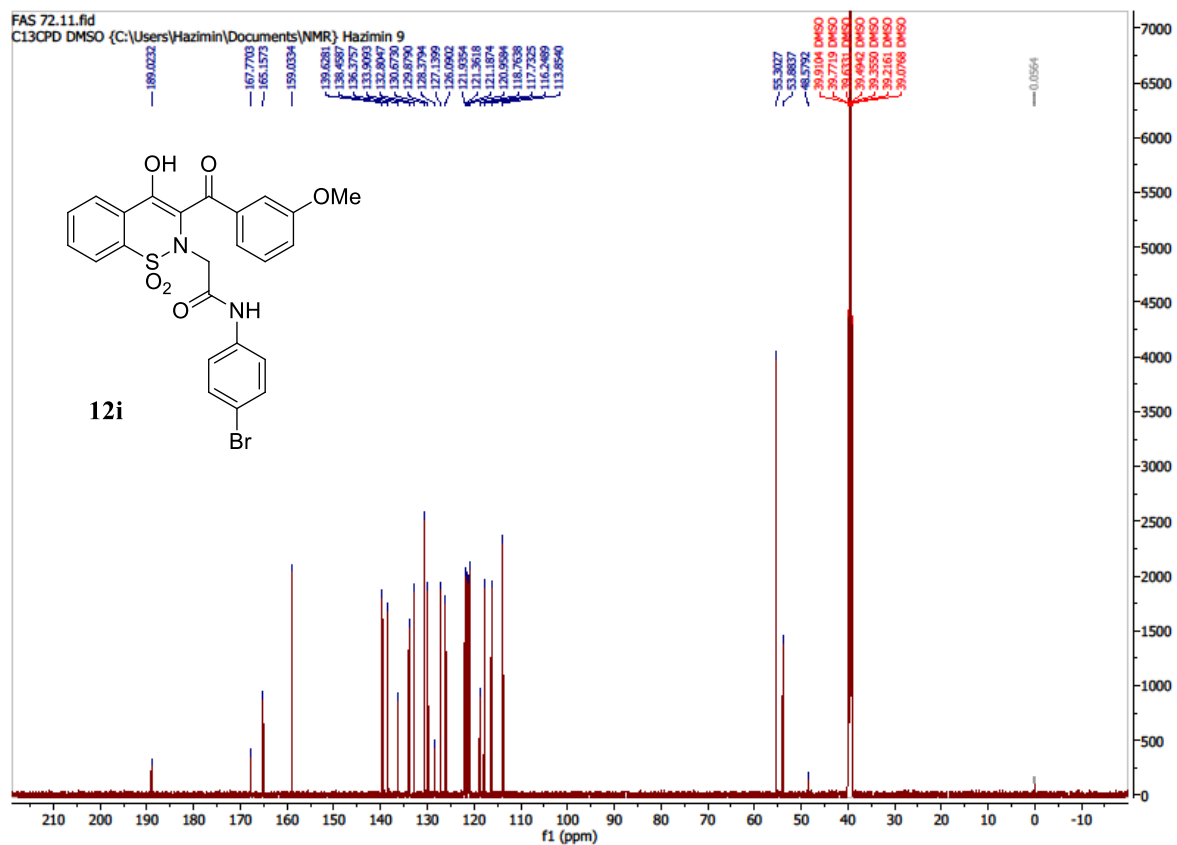

<sup>13</sup>C NMR Spectrum of compound **12i**.

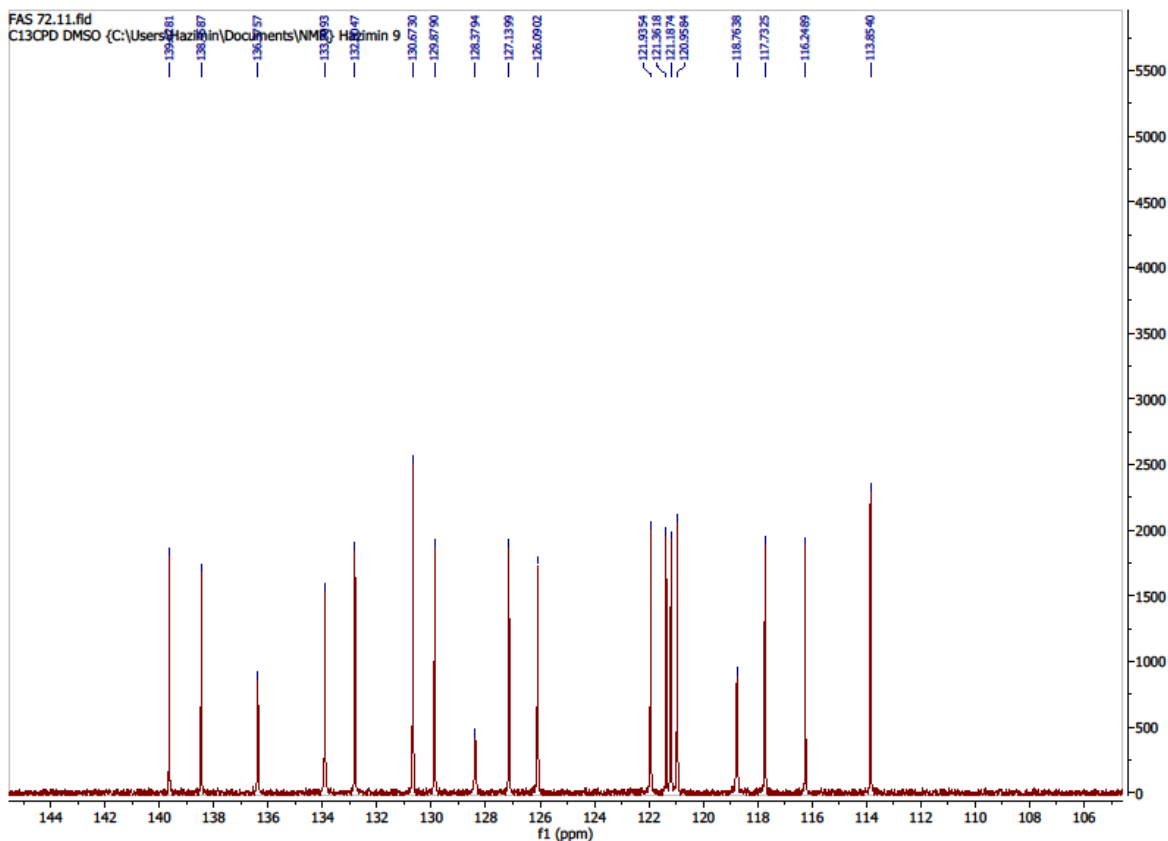

Expanded form of  $^{13}\text{C}$  NMR Spectrum of compound **12i** (region 114-140 ppm).

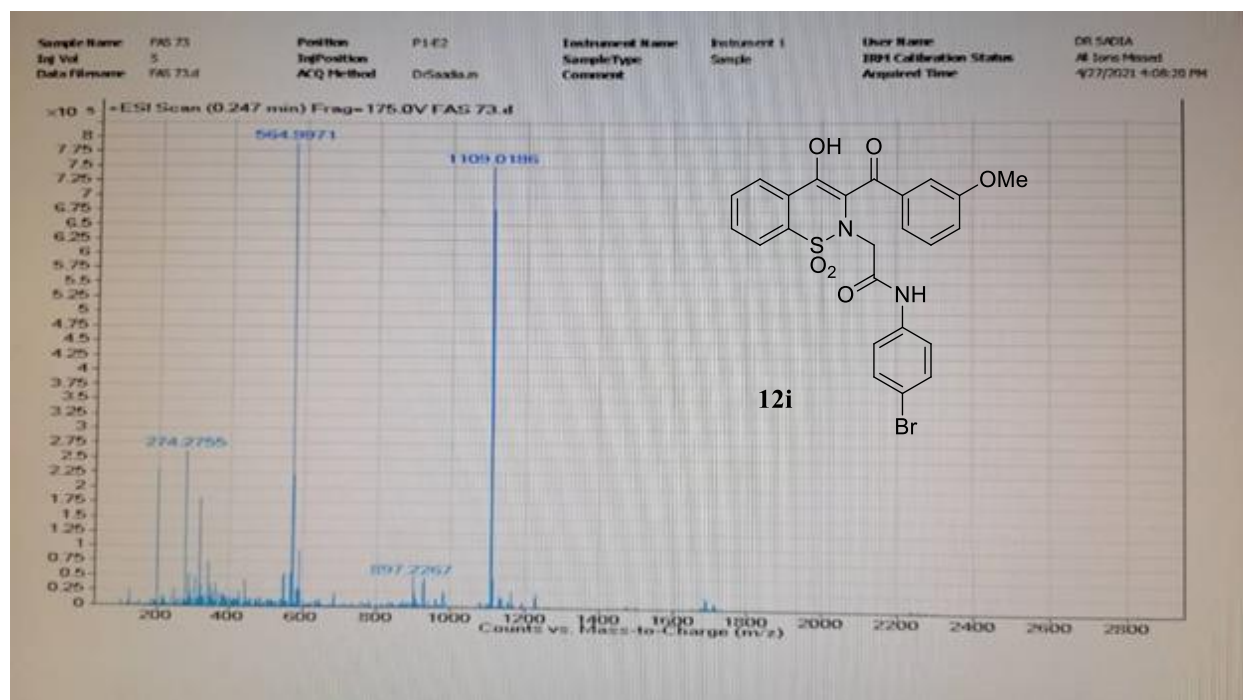

HRMS (ESI) Spectrum of compound **12i**.

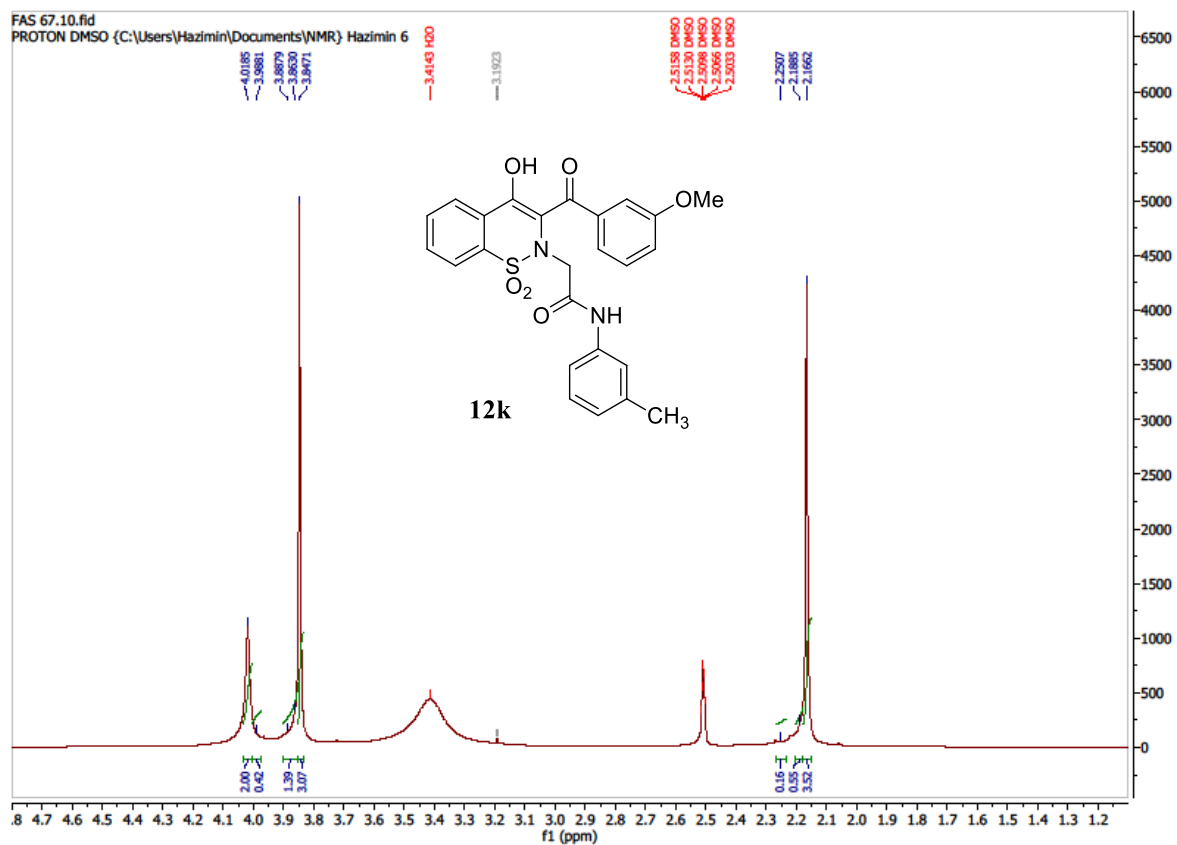

<sup>1</sup>H NMR Spectrum (up-field region) of compound **12k**.

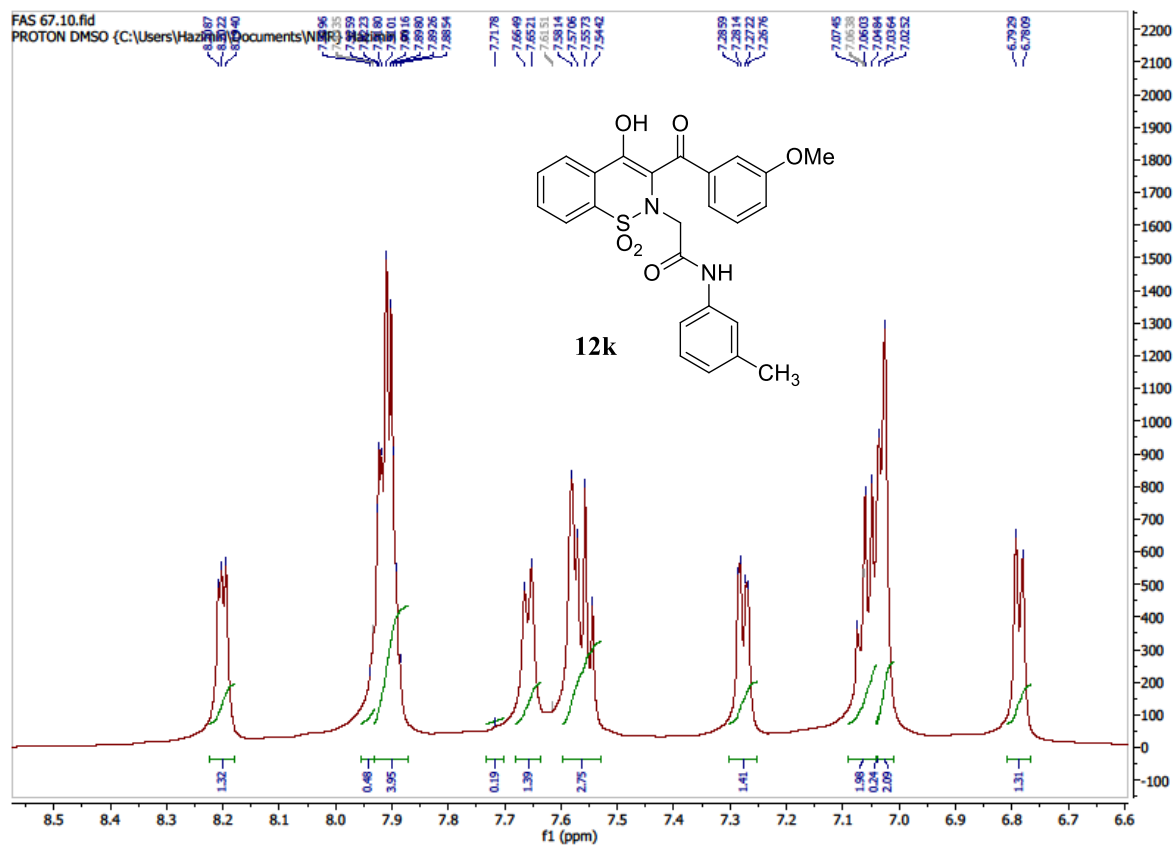

<sup>1</sup>H NMR Spectrum (down-field region) of compound 12k.

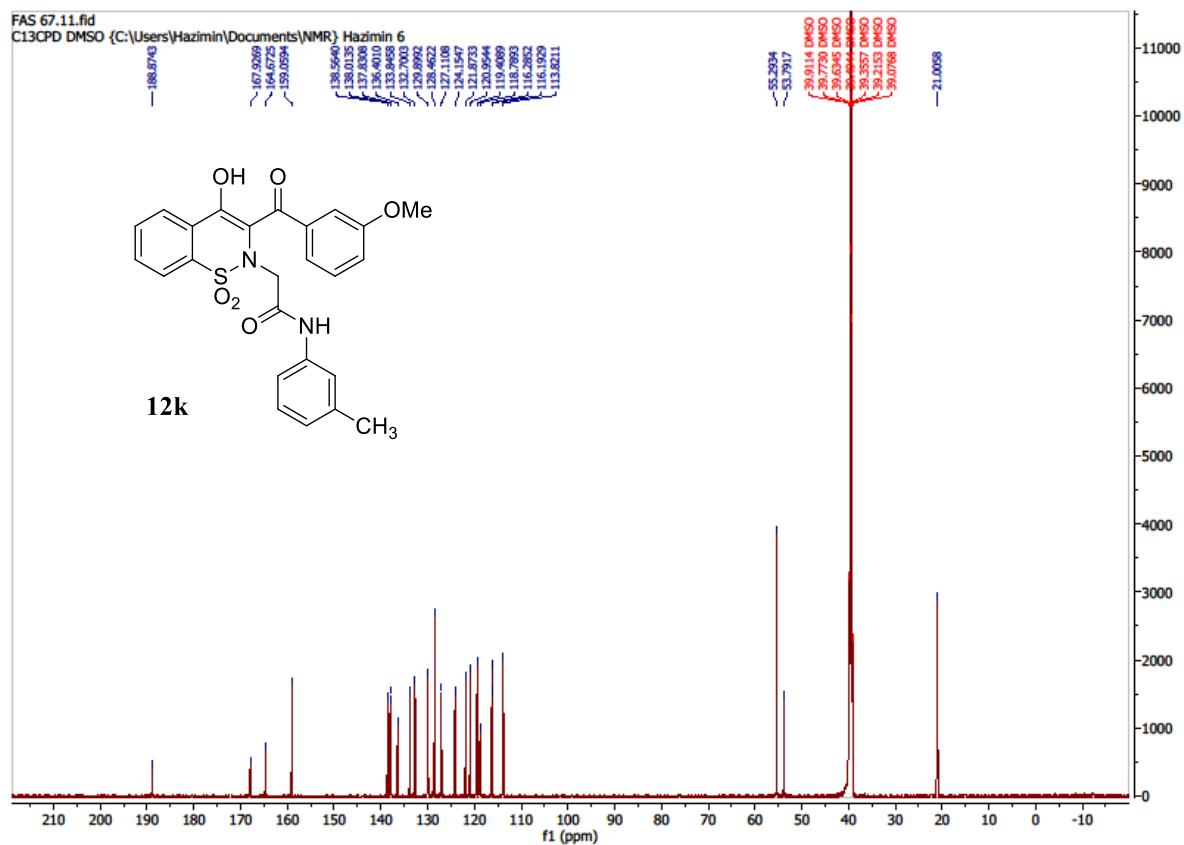

$^{13}\text{C}$  NMR Spectrum of compound **12k**.



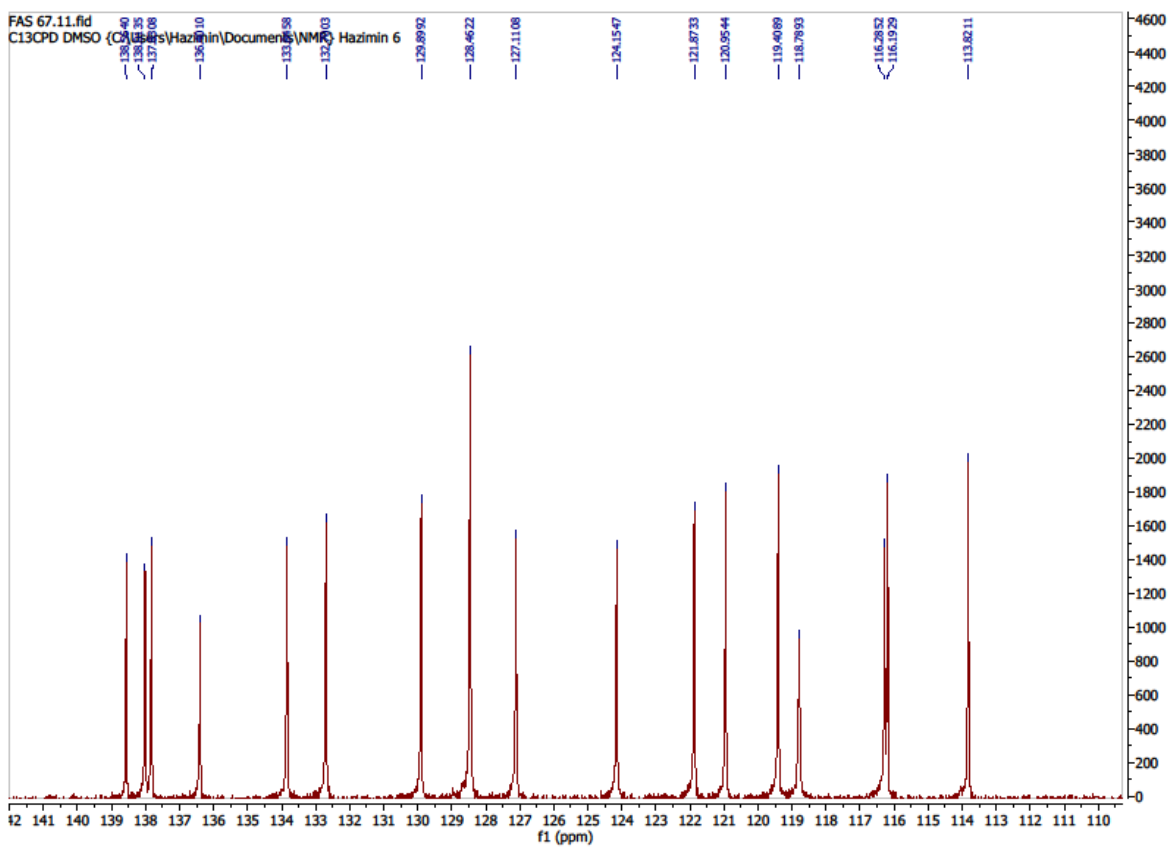

Expanded form of  $^{13}\text{C}$  NMR Spectrum of compound **12k** (region 113-139 ppm).

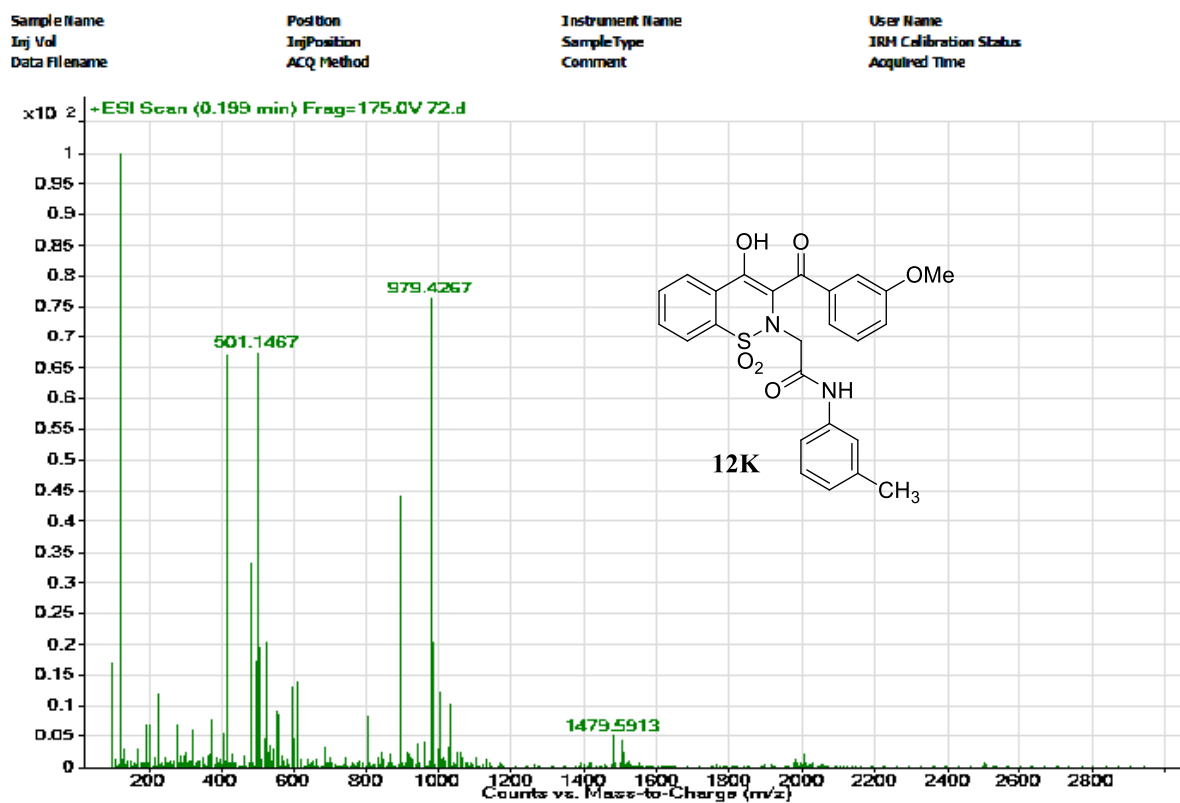

HRMS (ESI) Spectrum of compound 12k.

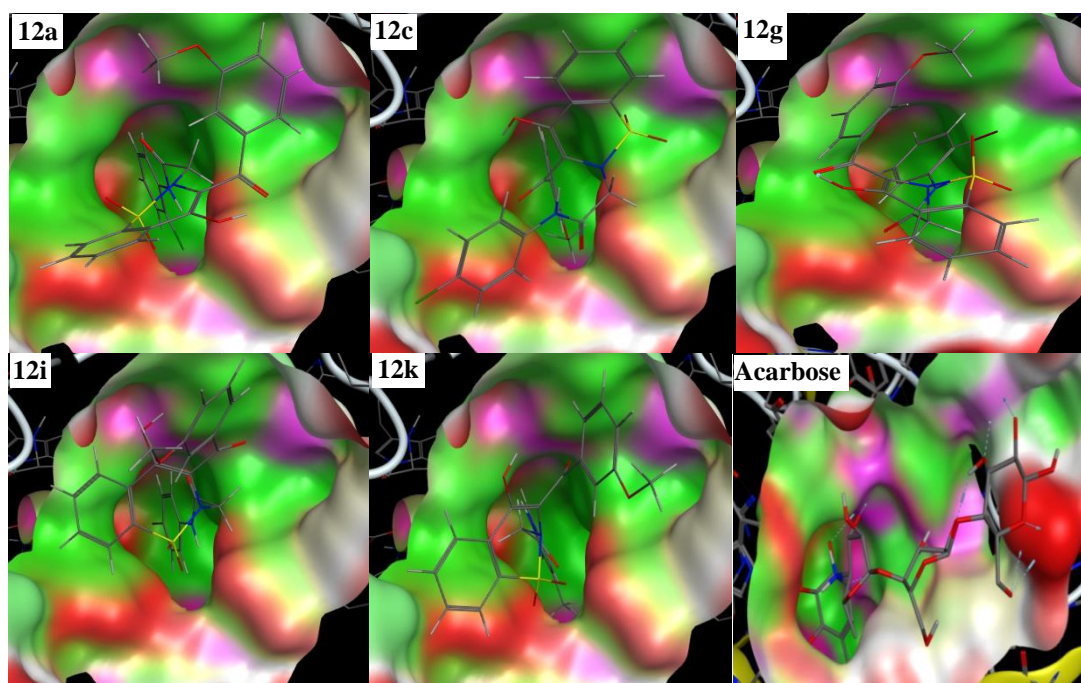

**Figure S1.** 3D docking modes of potent compounds (**12a**, **12c**, **12g**, **12i**, **12k**) and the reference drug, acarbose against  $\alpha$ -glucosidase enzyme. Red color portions indicate the ligand exposure points and color portion shows pocket selected.

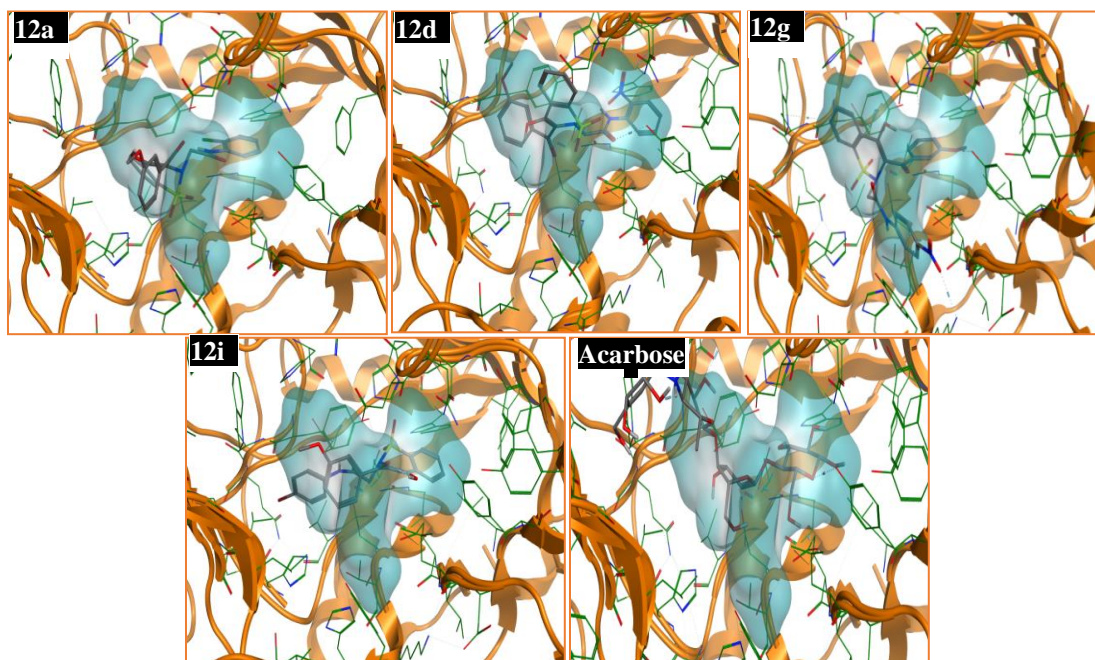

**Figure S2.** 3D docking modes of potent compounds (**12a**, **12d**, **12g**, **12i**) and the reference drug, acarbose against amylase enzyme. Red color portions indicate the ligand exposure points and color portion shows pocket selected.
